# Supplementary material
Source: MDPI journal article supplement (https://www.mdpi.com/2311-7524/7/10/404)
Supplement: s1 [file s1]

**Table S1.** Information of the *Perilla frutescens* var. *crispa* genotypes used in this study.

| Genotypes | IT number |
|-----------|-----------|
| Pfc 1     | IT 220490 |
| Pfc 2     | IT 220510 |
| Pfc 3     | IT 226634 |
| Pfc 4     | IT 242256 |
| Pfc 5     | IT 293402 |
| Pfc 6     | IT 242083 |
| Pfc 7     | IT 283681 |
| Pfc 8     | IT 283684 |

**Table S2.** Primer sequences for qRT-PCR analysis.

| Primer name                     | Sequence (5'-3')             | Accession number |
|---------------------------------|------------------------------|------------------|
| <i>COX2</i>                     | F-CCTCTGCGATGCTCTTCC         | AF233596.1       |
|                                 | R-TCACACTTATACTGGTCAAA       |                  |
| <i>iNOS</i>                     | F-TCCTACACCACACCAAAC         | AF427516.1       |
|                                 | R-CTCCAATCTCTGCCTATCC        |                  |
| <i>TNF-<math>\alpha</math></i>  | F-AGCACAGAAGCATGATCCG        | AY423855.1       |
|                                 | R-CTGATGAGAGGGAGGCCATT       |                  |
| <i>IL-6</i>                     | F-CCACTTCACAAGGTCGGAGGCTTA   | DQ788722.1       |
|                                 | R-GTGCATCATCGCTGTTTCATACAATC |                  |
| <i>IL-1<math>\beta</math></i>   | F-TGTGAAATGCCACCTTTTGA       | NM_008361.4      |
|                                 | R-TGAGTGATACTGCCTGCCTG       |                  |
| <i><math>\beta</math>-actin</i> | F-CCCATCTCCTAAGAGGAGGATG     | NM_007393.5      |
|                                 | R-AGGGAGACCAAAGCCTTCAT       |                  |
